# Supplementary material for: Generation of Superoxide by OeRbohH, a NADPH Oxidase Activity During Olive (Olea europaea L.) Pollen Development and Germination
Source: PubMed Central journal article supplement (PMC6761571; doi:10.3389/fpls.2019.01149), 2019-09-19
Supplement: DataSheet_1.pdf [file DataSheet_1.pdf]

*Supplementary Material*

**Generation of superoxide by OeRbohH, a NADPH oxidase activity during olive (*Olea europaea* L.) pollen development and germination.**

**María José Jimenez-Quesada, José Angel Traverso, Martin Potocký, Viktor Žárský and Juan de Dios Alché\***

\* **Correspondence:** Juan de Dios Alché [juandedios.alche@eez.csic.es](mailto:juandedios.alche@eez.csic.es)

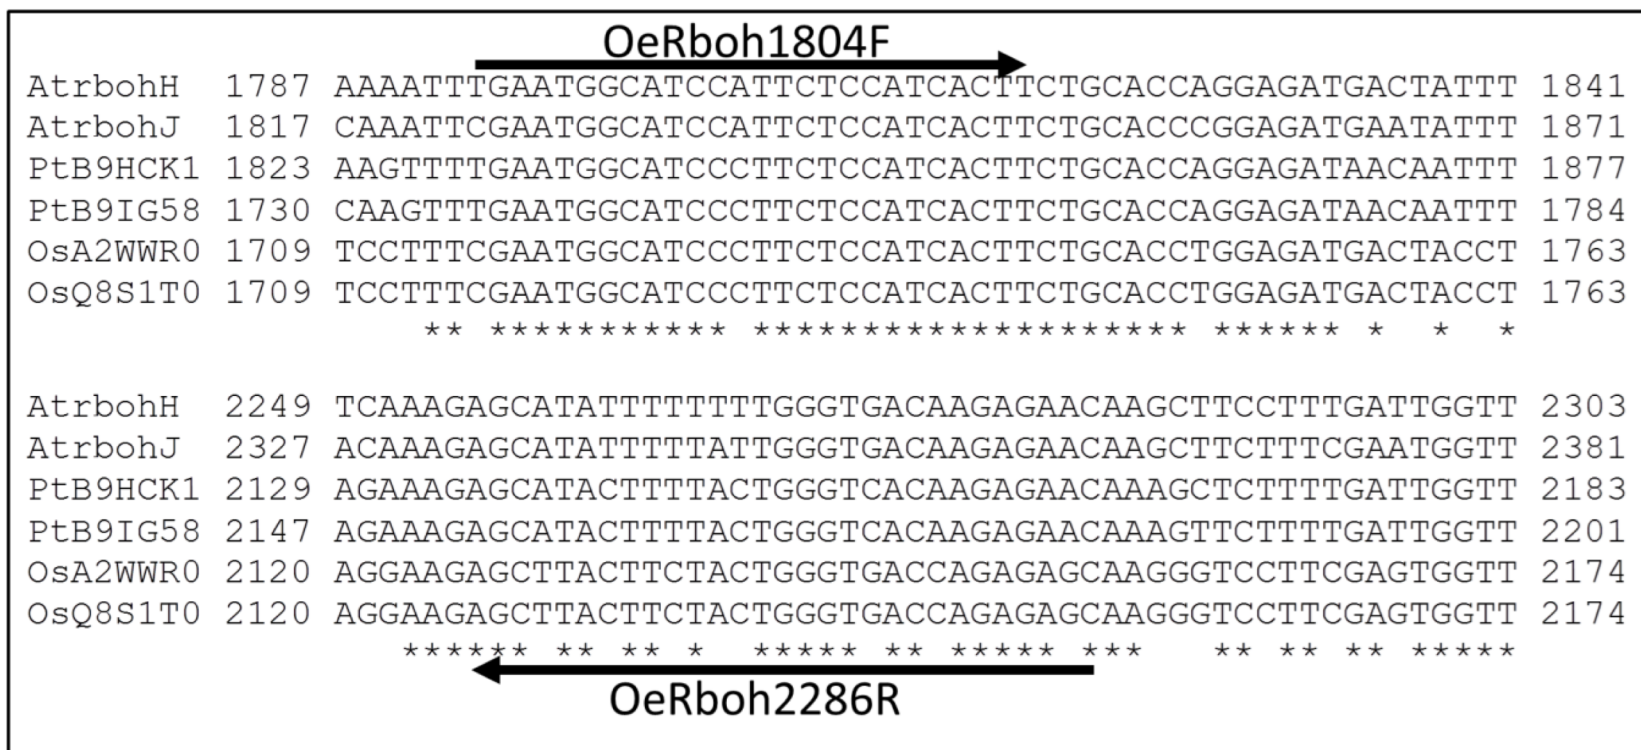

**Supplementary Figure 1.** Partial ORF alignment of homologous plant NOXs from *A. thaliana* (At5g60010, At3g45810), *P. trichocarpa* (PtB9HCK1, PtB9IGS8) and *O. sativa* (OsA2WWR0, OsQ8S1T0). Arrows indicate the conserved domains used to design degenerated primers forward and reverse.

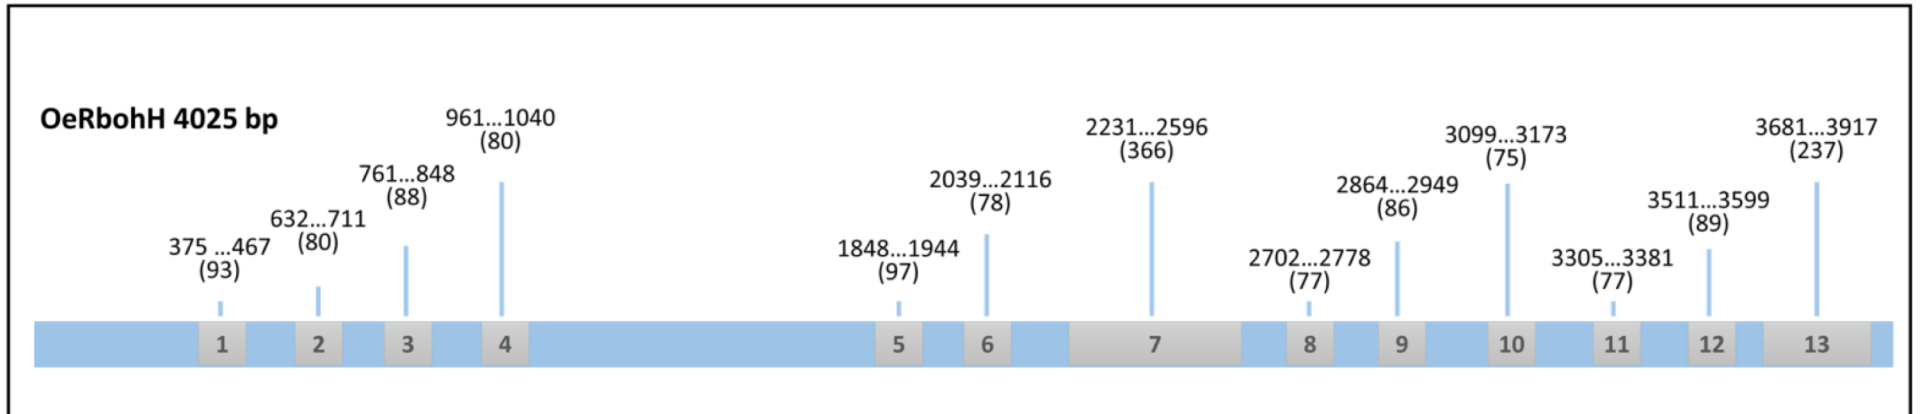

**Supplementary Figure 2.** Genomic sequence of olive pollen *OeRbohH* with introns location (grey boxes). Location and length in bp (in brackets) are indicated.

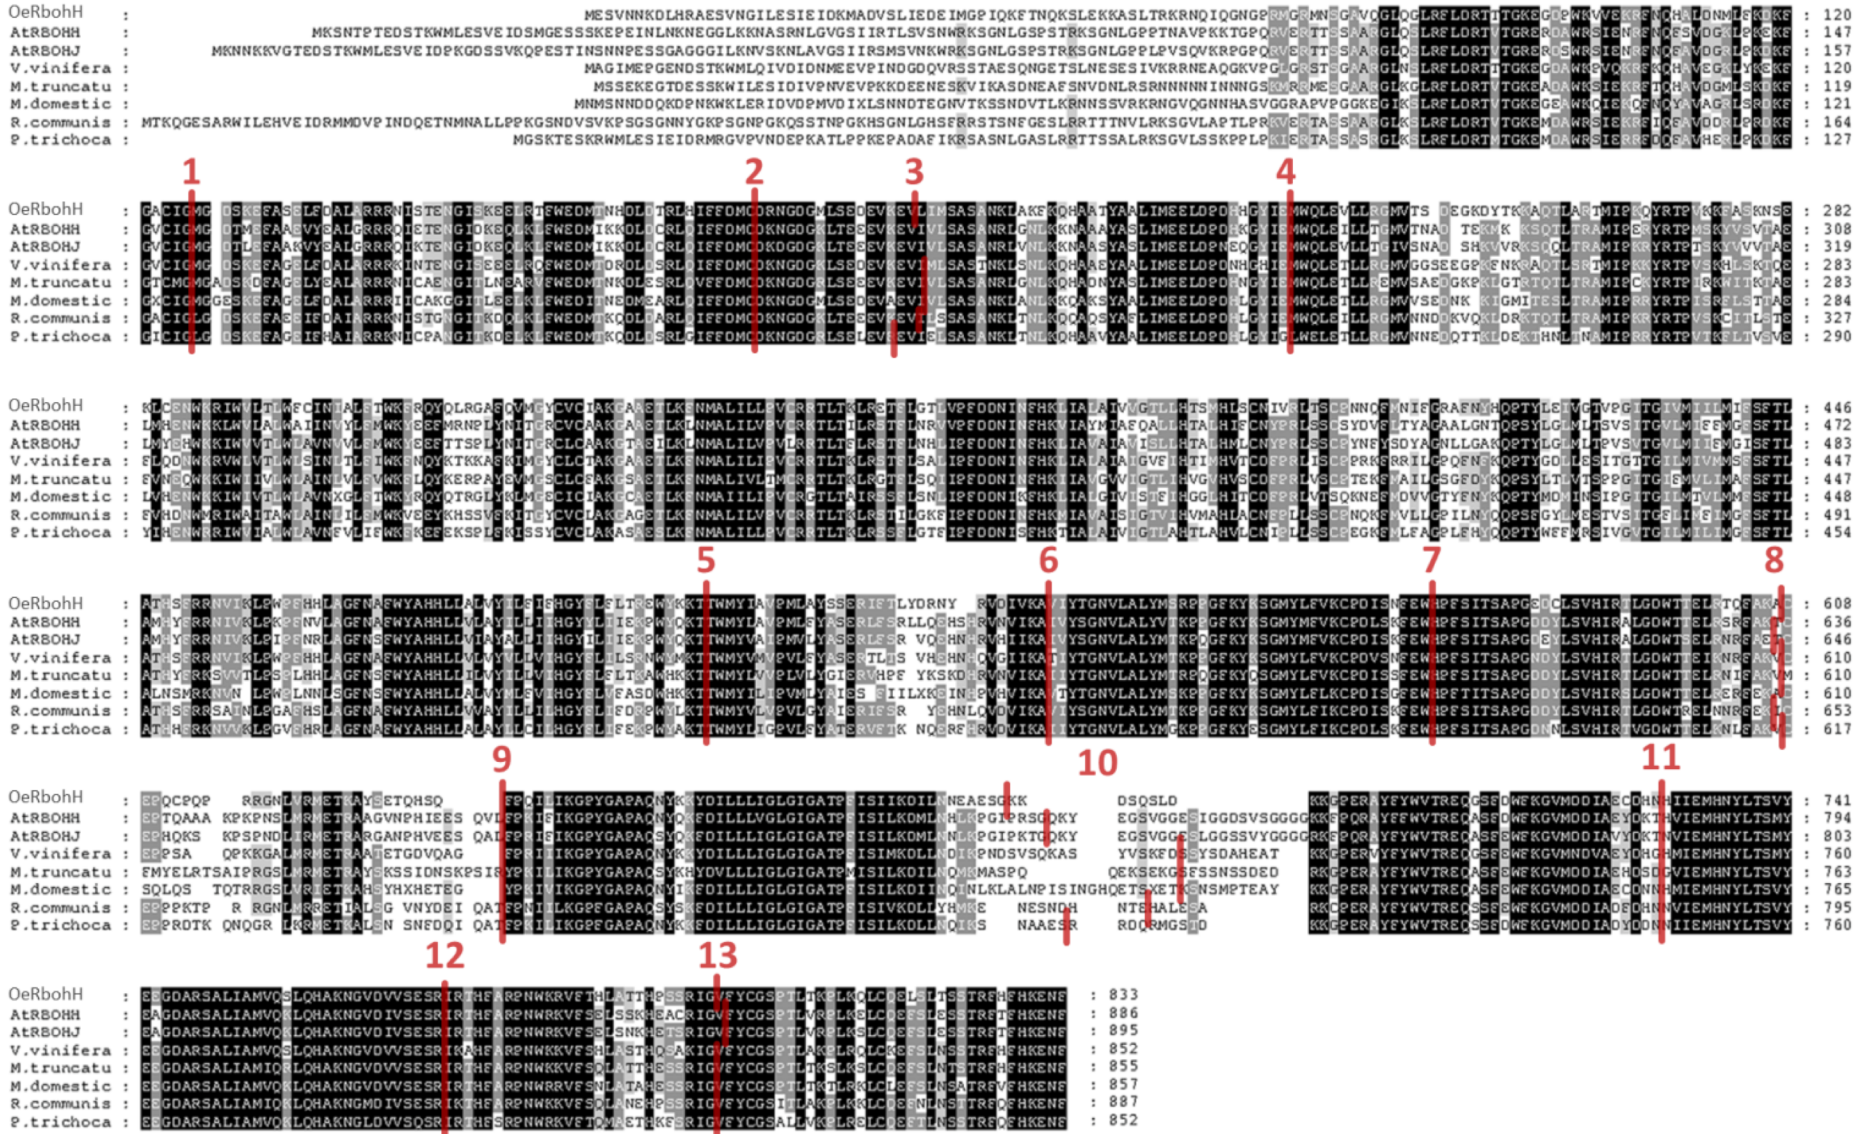

**Supplementary Figure 3.** OeRbohH introns are conserved. Amino acid alignment of Rbohs from *A. thaliana*, *V. vinifera*, *M. truncatula*, *M. domestica*, *R. communis*, and *P. trichocarpa*. Introns location is conserved (red boxes).

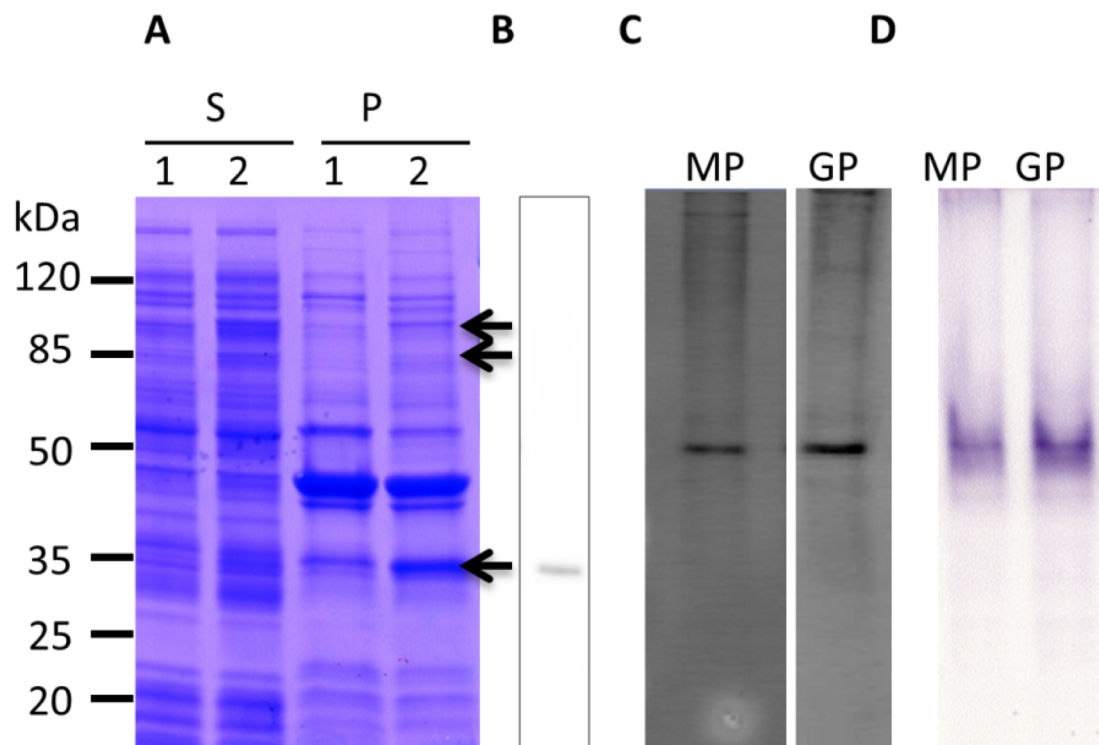

**Supplementary Figure 4.** (A) SDS-PAGE of crude protein extracts of *E. coli* after induction of the expression. S: soluble fraction. P: precipitate; 1: negative control (pET51b); 2: expression construct (pET51b-OeRbohH). Arrows indicate the 3 bands which were later identified by LC-ESI-MS as such OeRbohH. (B) Western-blot using an anti-HisTag antibody in the insoluble fraction of the extract. (C) Western-blot using the anti-OeRbohH antibody in olive pollen protein extracts subjected to native-PAGE. The immuno-reactive band in the blot match the NADPH oxidase activity band in parallel in gel activity assays (D). MP, mature pollen; GP: germinated pollen.



| Primer name    | Sequence                                      | Use                                               |
|----------------|-----------------------------------------------|---------------------------------------------------|
| OeRboh1804F    | GAATGGCATCCMTTCTCCATCACTTC                    | Degenerated primer plant Rbohs                    |
| OeRboh2286R    | TCTCTKGSACCCARWARAARTAWGCTCTT                 |                                                   |
| UPM long       | CTAATACGACTCACTATAGGGCAAGCAGTGGTATCAACGCAGAGT | Universal Primer for RACE 5' y RACE 3'            |
| UPM short      | CTAATACGACTCACTATAGGGC                        |                                                   |
| PoliT24(A)     | TTTTTTTTTTTTTTTTTTTTTTTTTTN                   | Race 3'                                           |
| OeRbohFW2      | CTAATTGGTTTGGGAATTGGAGCAACCCC                 | RACE 3'                                           |
| OeRbohRW2      | CTGACTAAGTTTCCCCTTCTGGTTGTGGACTGAGG           | RACE 5'                                           |
| OeXbaRbohF     | CGCTCTAGAATGGAATCAGTGAACAATAAAGATC            | For coding genomic, pET51b and GFP vector cloning |
| OeSacRbohR     | GCCGAGCTCCAAAGTTTTCTTGTGAAAATG                | For coding genomic and pET51b vector cloning      |
| UTRRbohF       | ATTGATATTCGTACTAGTATCTCAACAG                  | Gene expression studies                           |
| UTRRbohR       | AAAATGCGAGAATTTTACAAGTATTCAC                  |                                                   |
| Oe18S-F        | TTTGATGGTACCTGCTACTCGGATAACC                  | Olive Housekeeping gene (ribosomal 18S)           |
| Oe18S-R        | CTCTCCGGAATCGAACCTAATTCTCC                    |                                                   |
| OeA-F          | TTGCTCTCGACTATGAACAGG                         | Olive Housekeeping gene (actin)                   |
| OeA-R          | CTCTCGGCCCAATAGTAATA                          |                                                   |
| OeqF           | AGTGTCACAACCAAGAAGG                           | For quantitative PCR                              |
| OeqR           | ATGGGGTTGCTCCAATC                             |                                                   |
| OeRbohR        | ACGTTCTAGAGAAAGTTTTCTTGTGAAAATG               | For GFP Vector cloning                            |
| OeRboh-Ngo-F   | ATAGCCGGCATGGAATCAGTGAACAAT                   | For YFP Vector cloning                            |
| OeRboh-Xma-RS  | TATCCCGGGTCAAGCTCCAAAGTTTTC                   |                                                   |
| OeRboh-Xma-RNS | TATCCCGGGTCCAGCTCCAAAGTTTTC                   |                                                   |
| OeRbohRW8      | CCCATTTACAGATTCTGCTCTATGTAGATCTTTATTGTTT      | For OeRbohH promoter isolation                    |
| OeRbohRW7      | GAAACATCAGCCATTTTATCAATCTCAATGCTCTCC          |                                                   |
| OeRbohRW9      | ATGAATTGCTCTGTCAAGGTGCTTATTGAGTCTTAGC         |                                                   |
| OeRbohRW10     | CGTCTCTCAAGATACAGCGAAATCTCCTTGCAGCAG          |                                                   |
| pRboh1.8F      | ATACTCGAGGCCCGGGGAGGTAT                       | For pBI101 cloning                                |
| pRboh1.5F      | TGCACTCGAGCGGGGAGGTAATTCTGCT                  |                                                   |
| pRboh0.7F      | GCGCTCGAGTCCGAATTACGAGT                       |                                                   |
| pRboh0.2F      | TGCACTCGAGGTAAGTTGGGGATCT                     |                                                   |
| pRbohR         | TGCAAGATCTGACTGACTGATTCTCTGTTGAG              |                                                   |

**Supplementary Table 1.** List of primers used in this study.

|   | PROTEIN HITS | NAME [ORGANISM]                                                                                                     | PEPTIDE                                                                                                        |
|---|--------------|---------------------------------------------------------------------------------------------------------------------|----------------------------------------------------------------------------------------------------------------|
| 1 | gi 56201942  | Putative respiratory burst oxidase [ <i>Oryza sativa Japonica</i> Group]                                            | R.IGVFYCGSPTLTK.Q<br>R.SALIAMVQSLQHAK.N                                                                        |
| 2 | gi 225435144 | PREDICTED: putative respiratory burst oxidase homolog protein H-like [ <i>Vitis vinifera</i> ]                      | K.NGVDVVSESR.I<br>K.FNMALILIPVCR.R + Oxidation (M)<br>R.SALIAMVQSLQHAK.N<br>R.SALIAMVQSLQHAK.N + Oxidation (M) |
|   |              |                                                                                                                     | gi 171903618                                                                                                   |
| 3 | gi 109631188 | NOX1 [ <i>Striga asiatica</i> ]                                                                                     | K.NGVDVVSESR.I<br>R.EQGSFDWFK.G<br>R.IGVFYCGSPTLTKPLK.K                                                        |
|   | gi 225435144 | PREDICTED: putative respiratory burst oxidase homolog protein H-like [ <i>Vitis vinifera</i> ]                      | R.FHFHK.E<br>K.NGVDVVSESR.I<br>R.SALIAMVQSLQHAK.N                                                              |
|   | gi 357131247 | PREDICTED: putative respiratory burst oxidase homolog protein H-like [ <i>Brachypodium distachyon</i> ]             | R.FHFHK.E<br>R.EQGSFDWFK.G<br>R.SALIAMVQSLQHAK.N                                                               |
|   | gi 357505521 | Respiratory burst oxidase-like protein [ <i>Medicago truncatula</i> ]                                               | R.FHFHK.E<br>K.NGVDVVSESR.I<br>R.THFARNWK.K                                                                    |
|   | gi 294462658 | Unknown [ <i>Picea sitchensis</i> ]                                                                                 | R.EEGSFDWFK.G<br>R.SALIAMLQALNHAK.H + Oxidation (M)<br>K.GIIEHNYCTSVYEEGDA<br>R.S                              |
|   | gi 18389310  | Respiratory burst oxidase protein F [ <i>Solanum tuberosum</i> ]                                                    | R.EQGSFDWFK.G<br>R.THFARNWK.K                                                                                  |
|   | gi 166199744 | RecName: Full=Respiratory burst oxidase homolog protein D; AltName: Full=NADPH oxidase RBOHD; AltName: Full=StRBOHD | R.EQGSFDWFK.G<br>R.SALIAMLQSLNHAK.N                                                                            |
|   | gi 356527324 | PREDICTED: respiratory burst oxidase homolog protein C-like isoform 1 [ <i>Glycine max</i> ]                        | R.EQGSFDWFK.G<br>R.SALIAMLQSLNHAK.N                                                                            |
|   | gi 326491643 | Predicted protein [ <i>Hordeum vulgare subsp. vulgare</i> ]                                                         | R.SALIAMLQSLNHAK.H<br>K.GIIEHNYCTSVYEEGDA<br>R.S                                                               |
|   | gi 168011242 | Predicted protein [ <i>Physcomitrella patens subsp. patens</i> ]                                                    | K.AYFYWMTR.E<br>R.THFARNWK.S                                                                                   |

**Supplementary Table 2.** Identification from samples 1, 2 and 3 and peptide summary obtained by LC-ESI-MS/MS. Taxonomy: Viridiplantae (Green Plants).
